# Supplementary material for: Highly porous structured polyaniline nanocomposites for scalable and flexible high-performance supercapacitors
Source: Royal Society of Chemistry journal article supplement (doi:10.1039/c9nr00427k), 2019-01-01
Supplement: c9nr00427k1.pdf [file c9nr00427k1.pdf]

Electronic Supplementary Information (ESI) for

## **Highly Porous Structured Polyaniline Nanocomposite for Free-sized and Flexible High-Performance Supercapacitor**

Jungkyun Oh<sup>a</sup>, Yun Ki Kim<sup>a</sup>, Jun Seop Lee<sup>b\*</sup> and Jyongsik Jang<sup>a\*</sup>

<sup>a</sup> School of Chemical and Biological Engineering, Seoul National University, 1 Gwanak-ro, Gwanak-gu, Seoul 08826, Republic of Korea

<sup>b</sup> Department of Materials Science and Engineering, Gachon University, 1342 Seongnam-Daero, Sujeong-Gu, Seongnam-Si, Gyeonggi-Do 13120, Republic of Korea

Corresponding Author:

\*E-mail: (J. Jang) [jsjang@plaza.snu.ac.kr](mailto:jsjang@plaza.snu.ac.kr); Tel.: +82-2-880-7069; Fax: +82-2-880-1604

\*E-mail: (J.S. Lee) [junseop@gachon.ac.kr](mailto:junseop@gachon.ac.kr); Tel.: +82-31-750-5814; Fax: +82-31-750-5389

## 1. Synthesis of Pt\_CPPyNP

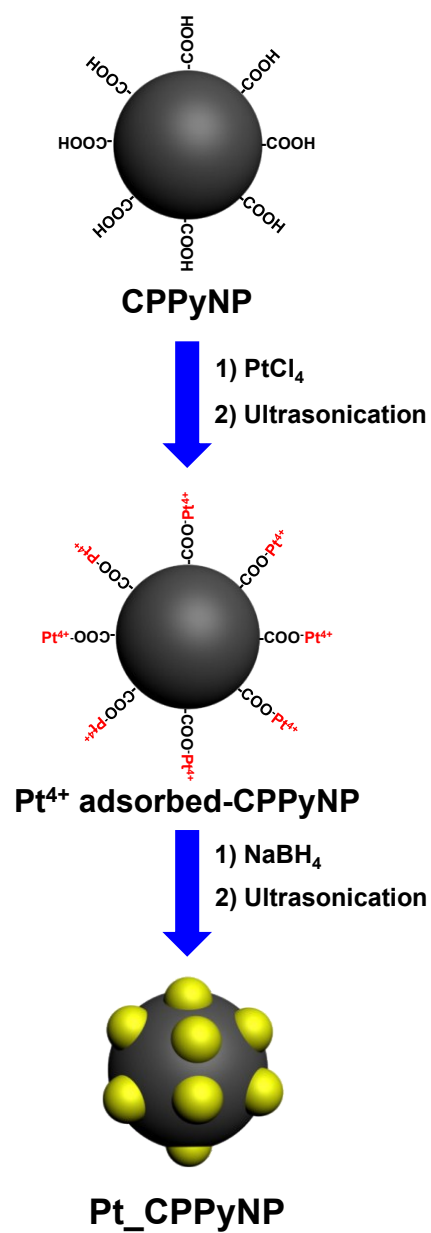

**Figure S1.** Illustrative diagram of fabrication steps for Pt decorated carboxyl polypyrrole nanoparticles (Pt\_CPPyNP).

## 2. Real images of PANI:CSA film

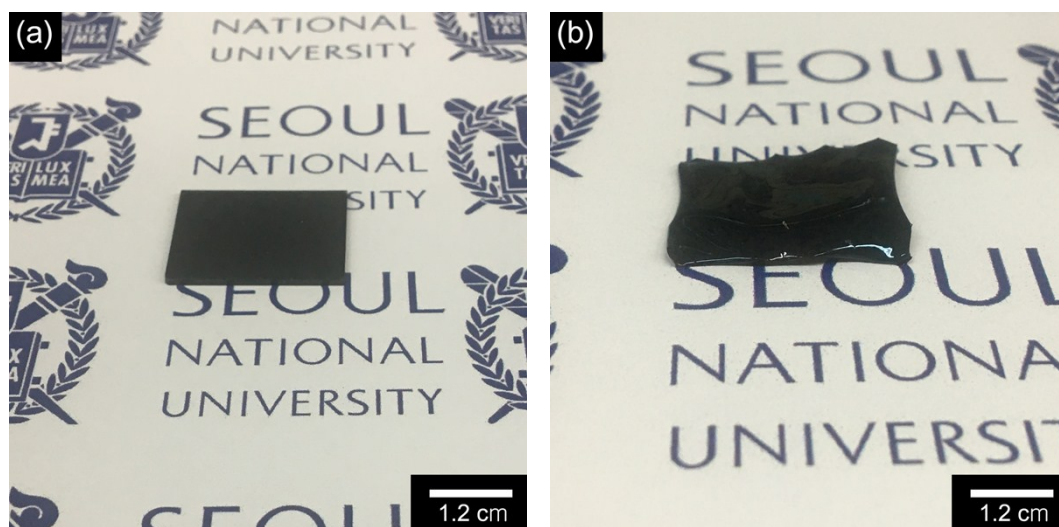

**Figure S2.** Real sample of Pt\_CPPy/PANI:CSA paste (a) coated on the glass substrate and (b) free-standing.

### 3. Flexibility test of PANI:CSA film

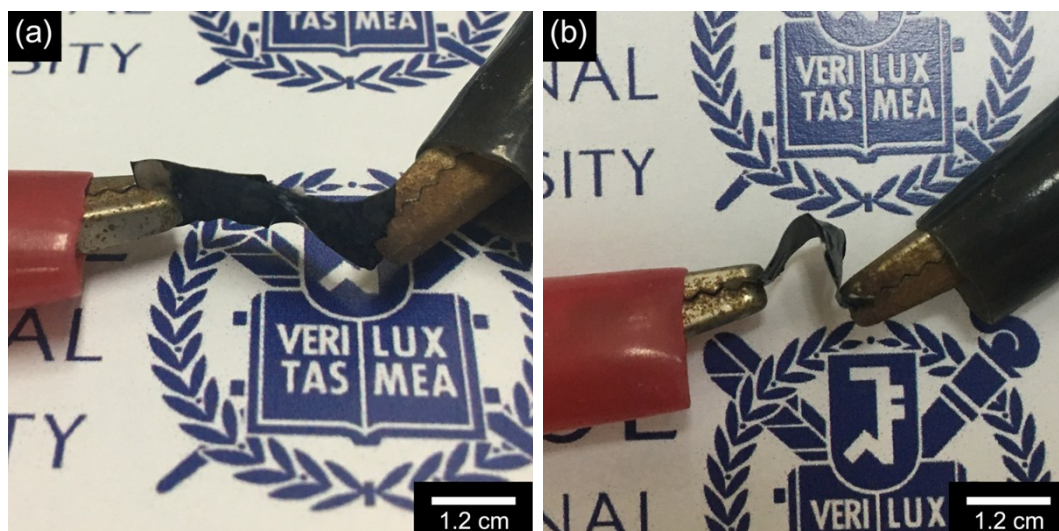

**Figure S3.** Photographs of the solid-state symmetric Pt\_CPPy/PANI:CSA supercapacitor with flat and bending formation.

#### 4. SEM images of Pt\_CPPy/PANI:CSA film before and after bending

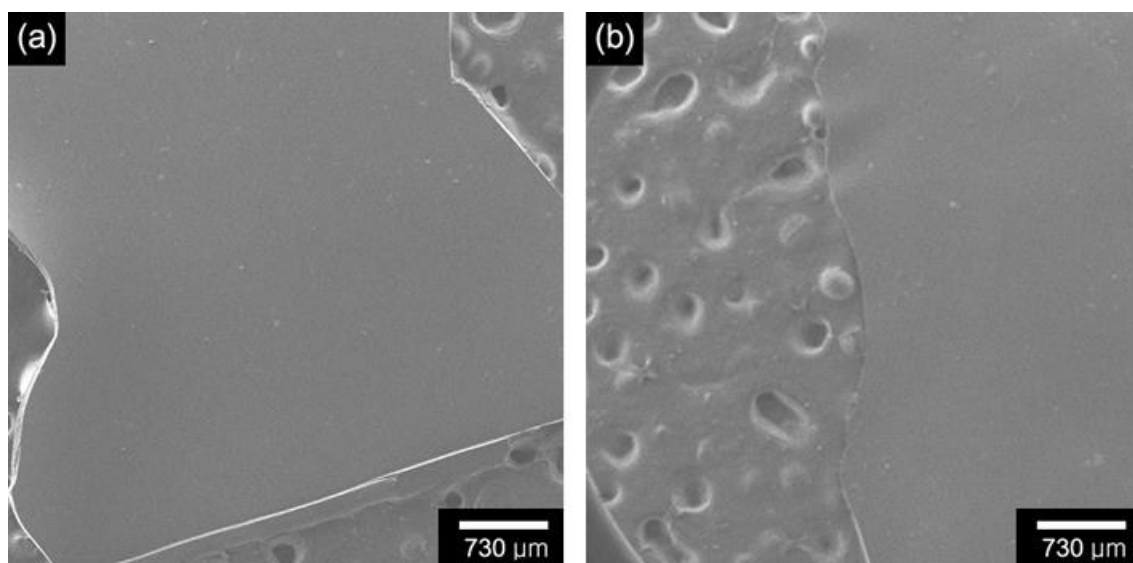

**Figure S4.** Scanning electron microscope (SEM) image of Pt\_CPPy/PANI:CSA film (a) before bending and (b) after 100 times bending.

## 5. Electrical conductivity of Pt\_CPPy/PANI:CSA film before and after bending

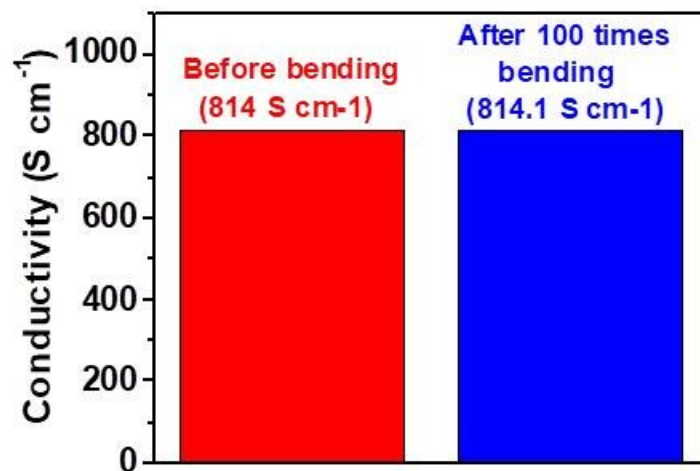

**Figure S5.** Electrical conductivity measurement of Pt\_CPPy/PANI:CSA film before bending (red) and after 100 times bending (blue).

## 6. Energy storage performance of PANI:CSA in two electrode system

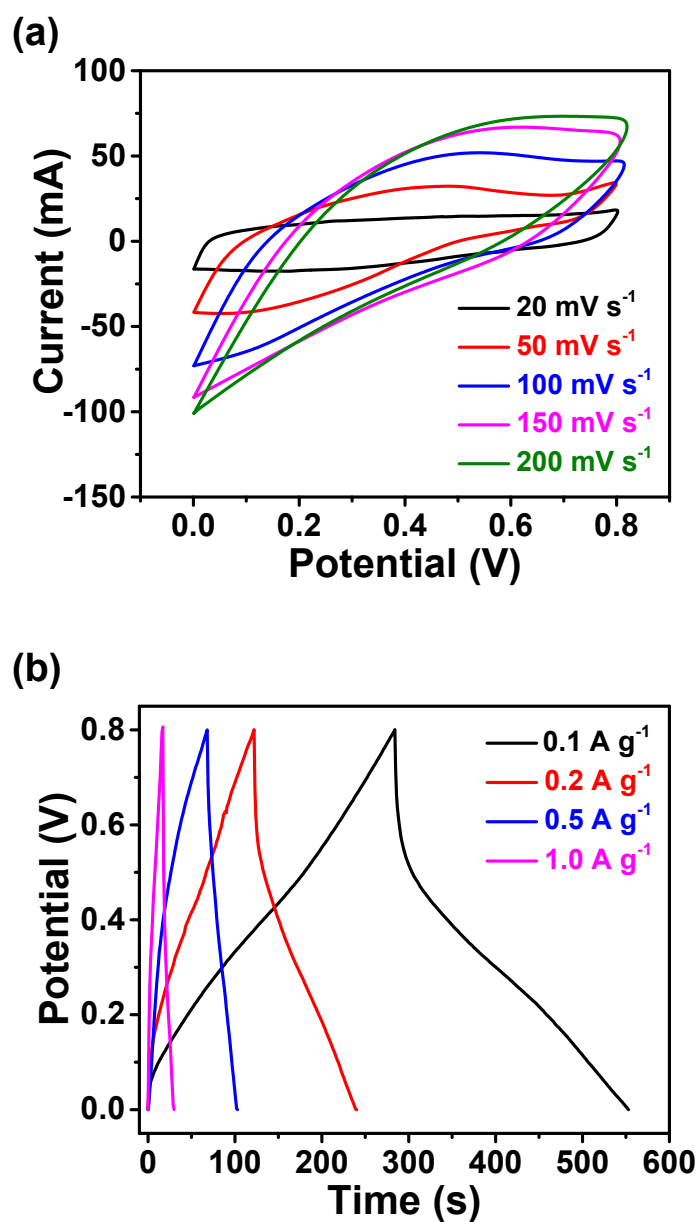

**Figure S6.** (a) Cyclic voltammetry and (b) galvanostatic charge-discharge curves of the solid-state symmetric supercapacitor based on Pt\_CPPy/PANI:CSA paste with various voltage scan rates (20 to 200  $\text{mV s}^{-1}$ ) and current densities (0.1 to 1.0  $\text{A g}^{-1}$ ).
